# Supplementary material for: Southern Hemisphere bog persists as a strong carbon sink during droughts
Source: Copernicus journal article supplement (doi:10.5194/bg-14-4563-2017), 2017-10-16
Supplement: Supplementary file 1 [file bg-14-4563-2017-supplement.pdf]

Supplement of Biogeosciences, 14, 4563–4576, 2017  
<https://doi.org/10.5194/bg-14-4563-2017-supplement>  
© Author(s) 2017. This work is distributed under  
the Creative Commons Attribution 3.0 License.

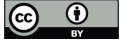

*Supplement of*

## **Southern Hemisphere bog persists as a strong carbon sink during droughts**

**Jordan P. Goodrich et al.**

*Correspondence to:* Jordan P. Goodrich ([jpgoodrich@ucsd.edu](mailto:jpgoodrich@ucsd.edu))

The copyright of individual parts of the supplement might differ from the CC BY 3.0 License.

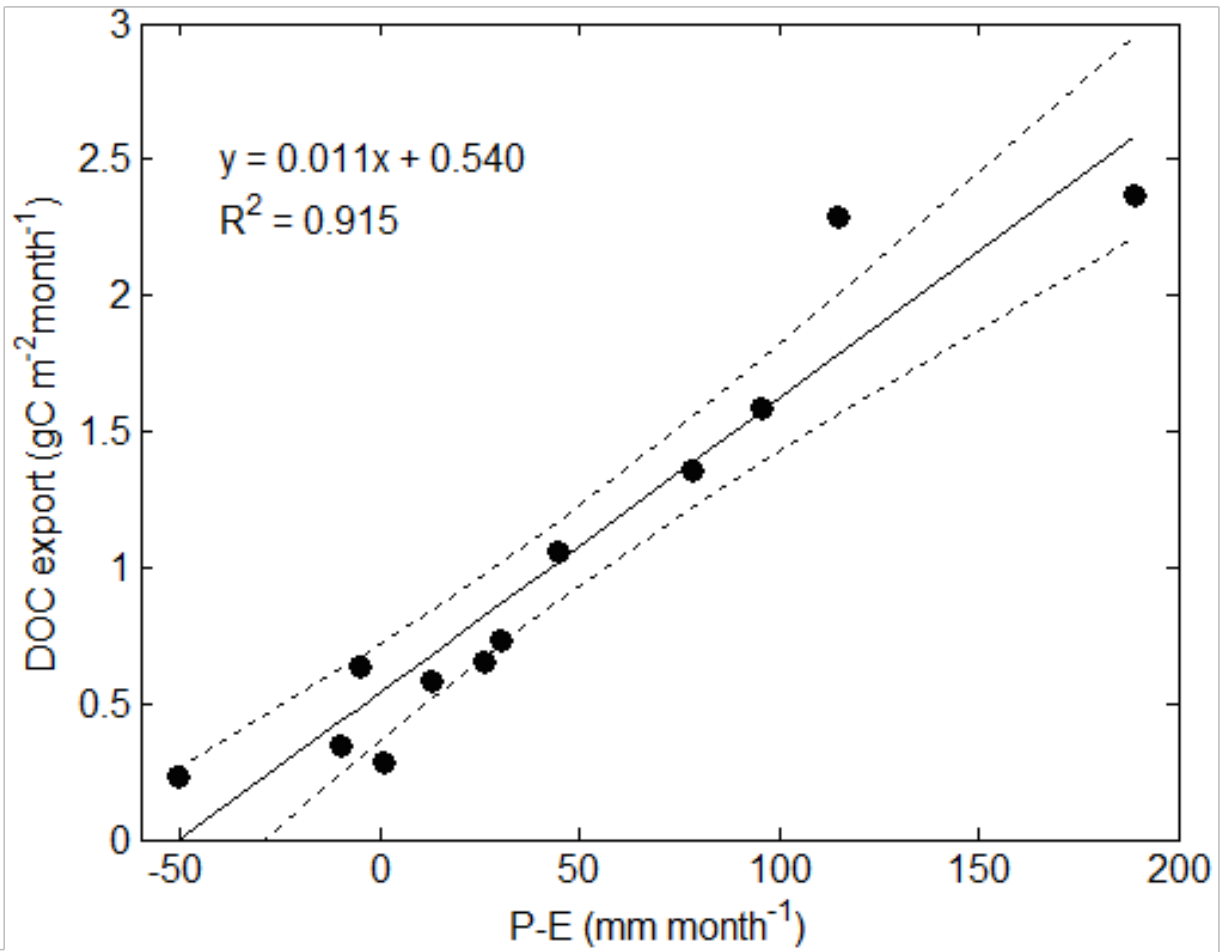

Figure S1. Monthly dissolved organic export from Kopuatai bog eddy covariance footprint as a function of the surface-atmosphere water balance (precipitation minus evaporation) for February 2012 to January 2013. Dotted lines show 95% confidence interval of the linear fit (solid line).
